# Supplementary material for: Description of an advance care planning intervention in nursing homes: outcomes of the process evaluation
Source: PubMed Central journal article supplement (PMC5785831; doi:10.1186/s12877-018-0713-7), 2018-01-25
Supplement: 12877_2018_713_MOESM1_ESM.pdf [file 12877_2018_713_MOESM1_ESM.pdf]

## Traffic light evaluation of ACP

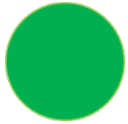

We have achieved a high level of competence and do not need help

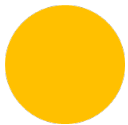

We have achieved some level of competence, but need to learn more

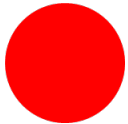

We have not achieved enough competence and for us this is not clear
